# Supplementary material
Source: publisher figshare collection journal article supplement (https://frontiersin.figshare.com/ndownloader/files/24883844)
Supplement: Supplementary file [file 24883844]

Table 1. Outliers detected and excluded in the amplitude of uIPSCs.

| Figure 1C |        |       | Figure 3 | Figure 4 | Figure 5 |        | Figure 6  |             |
|-----------|--------|-------|----------|----------|----------|--------|-----------|-------------|
| 2N        | 5N     | 2N3D  |          |          | 5N+Veh   | 5N+WIN | 2N3DL+Veh | 2N3DL+AM251 |
| 511.3     | 1093.7 | 593.2 | None     | None     | None     | 1153.4 | None      | 706.6       |
| 513.4     |        | 536.1 |          |          |          |        |           | 507.7       |
|           |        |       |          |          |          |        |           | 586.2       |
|           |        |       |          |          |          |        |           | 497.4       |
|           |        |       |          |          |          |        |           | 736.7       |

Table 2. Membrane properties and spike features of PV-INs and Pyr-cells in 2N3D mice.

|                            | <b>Veh</b>    | <b>WIN</b>    | <b>Stat-value</b>   |              |
|----------------------------|---------------|---------------|---------------------|--------------|
| <b>V_spike peak (mV)</b>   | 17.3 ± 2.2    | 16.2 ± 1.8    | $t_{(20)} = 0.3674$ | $p = 0.7172$ |
| <b>V_trough (mV)</b>       | -62.7 ± 1.9   | -66.8 ± 1.0   | $U = 39$            | $p = 0.2093$ |
| <b>V_threshold (mV)</b>    | -51.0 ± 2.0   | -53.1 ± 0.9   | $t_{(20)} = 0.8392$ | $p = 0.4113$ |
| <b>Spike height (mV)</b>   | 80.1 ± 1.8    | 83.0 ± 2.1    | $t_{(20)} = 1.053$  | $p = 0.3049$ |
| <b>Spike width (ms)</b>    | 0.44 ± 0.03   | 0.45 ± 0.03   | $U = 57.5$          | $p = 0.9576$ |
| <b>Upstroke (mV/ms)</b>    | 347.7 ± 25.7  | 370.9 ± 30.6  | $t_{(20)} = 0.5801$ | $p = 0.5683$ |
| <b>Downstroke (mV/ms)</b>  | -226.4 ± 17.5 | -220.5 ± 22.0 | $t_{(20)} = 0.2132$ | $p = 0.8333$ |
| <b>Up/downstroke ratio</b> | -1.59 ± 0.11  | -1.72 ± 0.07  | $t_{(20)} = 0.9076$ | $p = 0.3749$ |
| <b>RMP (mV)</b>            | -68.4 ± 1.0   | -69.6 ± 1.1   | $t_{(20)} = 0.7618$ | $p = 0.4551$ |
| <b>Rin (MΩ)</b>            | 81.5 ± 8.3    | 70.5 ± 10.3   | $t_{(14)} = 0.8165$ | $p = 0.4279$ |
| <b>Rin_Pyr (MΩ)</b>        | 360.7 ± 45.4  | 341.4 ± 26.6  | $U = 221$           | $p = 0.8193$ |

Two-tailed unpaired t test or M-W test reported with  $t$  or  $U$ , respectively, was used for statistical analyses. Data were presented as mean ± SEM.

Table 3. Membrane properties and spike features of PV-INs and Pyr-cells in 5N mice.

|                            | Veh           | WIN           | Stat-value          |                                |
|----------------------------|---------------|---------------|---------------------|--------------------------------|
| <b>V_spike peak (mV)</b>   | 13.9 ± 1.9    | 13.3 ± 2.1    | $t_{(23)} = 0.1993$ | $p = 0.8438$                   |
| <b>V_trough (mV)</b>       | -67.1 ± 0.5   | -63.5 ± 0.6   | $t_{(23)} = 4.395$  | <b><math>p = 0.0002</math></b> |
| <b>V_threshold (mV)</b>    | -52.7 ± 1.0   | -46.3 ± 2.3   | $t_{(23)} = 2.272$  | <b><math>p = 0.0328</math></b> |
| <b>Spike height (mV)</b>   | 80.0 ± 2.0    | 76.8 ± 2.1    | $t_{(23)} = 1.461$  | $p = 0.1575$                   |
| <b>Spike width (ms)</b>    | 0.38 ± 0.03   | 0.50 ± 0.06   | $U = 43$            | $p = 0.0566$                   |
| <b>Upstroke (mV/ms)</b>    | 378.6 ± 27.6  | 324.2 ± 24.1  | $t_{(23)} = 1.485$  | $p = 0.1511$                   |
| <b>Downstroke (mV/ms)</b>  | -248.8 ± 17.7 | -189.9 ± 18.9 | $t_{(23)} = 2.224$  | <b><math>p = 0.0362</math></b> |
| <b>Up/downstroke ratio</b> | -1.52 ± 0.04  | -1.77 ± 0.08  | $U = 31$            | <b><math>p = 0.0108</math></b> |
| <b>RMP (mV)</b>            | -70.0 ± 0.8   | -67.8 ± 0.8   | $U = 48.5$          | $p = 0.1177$                   |
| <b>Rin (MΩ)</b>            | 53.1 ± 3.3    | 66.1 ± 4.2    | $t_{(23)} = 2.353$  | <b><math>p = 0.0275</math></b> |
| <b>Rin_Pyr (MΩ)</b>        | 272.5 ± 24.8  | 313.2 ± 33.6  | $t_{(48)} = 0.9724$ | $p = 0.3357$                   |

Two-tailed unpaired t test or M-W test reported with  $t$  or  $U$ , respectively, was used for statistical analyses. Data were presented as mean ± SEM. Bold  $p$  value indicates statistical significance. Data were presented as mean ± SEM.

Table 4. Membrane properties and spike features of PV-INs and Pyr-cells in 2N3D+L mice.

|                            | <b>Veh</b>    | <b>AM251</b>  | <b>Stat-value</b>                 |                   |
|----------------------------|---------------|---------------|-----------------------------------|-------------------|
| <b>V_spike peak (mV)</b>   | 17.0 ± 1.9    | 15.1 ± 2.1    | <i>U</i> = 80                     | <i>p</i> = 0.4274 |
| <b>V_trough (mV)</b>       | -65.7 ± 1.0   | -64.5 ± 0.8   | <i>U</i> = 74                     | <i>p</i> = 0.2852 |
| <b>V_threshold (mV)</b>    | -48.8 ± 1.0   | -47.9 ± 2.0   | <i>U</i> = 96                     | <i>p</i> = 0.9459 |
| <b>Spike height (mV)</b>   | 81.8 ± 1.8    | 79.7 ± 2.0    | <i>U</i> = 92                     | <i>p</i> = 0.5907 |
| <b>Spike width (ms)</b>    | 0.44 ± 0.02   | 0.55 ± 0.09   | <i>U</i> = 104                    | <i>p</i> = 0.9732 |
| <b>Upstroke (mV/ms)</b>    | 366.9 ± 17.2  | 366.0 ± 26.3  | <i>t</i> <sub>(27)</sub> = 0.0302 | <i>p</i> = 0.9761 |
| <b>Downstroke (mV/ms)</b>  | -211.9 ± 13.7 | -205.6 ± 20.2 | <i>t</i> <sub>(23)</sub> = 0.2629 | <i>p</i> = 0.7946 |
| <b>Up/downstroke ratio</b> | -1.78 ± 0.08  | -1.92 ± 0.14  | <i>U</i> = 97                     | <i>p</i> = 0.7472 |
| <b>RMP (mV)</b>            | -69.1 ± 0.6   | -68.3 ± 0.8   | <i>t</i> <sub>(26)</sub> = 0.7766 | <i>p</i> = 0.4444 |
| <b>Rin (MΩ)</b>            | 68.3 ± 6.2    | 77.7 ± 6.8    | <i>U</i> = 73                     | <i>p</i> = 0.1718 |
| <b>Rin_Pyr (MΩ)</b>        | 352.3 ± 38.4  | 355.7 ± 52.7  | <i>U</i> = 271                    | <i>p</i> = 0.4350 |

Two-tailed unpaired t test or M-W test reported with *t* or *U*, respectively, was used for statistical analyses. Data were presented as mean ± SEM.
